# Supplementary material for: Conformational preferences of diimide-based dicarboxylate species and their coordination polymers
Source: Royal Society of Chemistry journal article supplement (doi:10.1039/d5ce00993f), 2025-12-15
Supplement: d5ce00993f1.pdf [file d5ce00993f1.pdf]

# **Conformational Preferences of Diimide-Based Dicarboxylate Species and their Coordination Polymers**

Winnie Cao,<sup>a</sup> Bianca K. Glascott,<sup>a</sup> Ekaterina I. Izgorodina,<sup>a</sup> and David R. Turner <sup>a\*</sup>

<sup>a</sup> School of Chemistry, Monash University, Clayton, VIC 3800, Australia

\*Correspondence: david.turner@monash.edu

## **Supporting Information**

**Table S1.** Summary of coordination polymers discussed in this work.

| Compound # | Formula                                                                           | Dimensionality | Reference                                                                                                                                 |
|------------|-----------------------------------------------------------------------------------|----------------|-------------------------------------------------------------------------------------------------------------------------------------------|
| <b>1Mn</b> | $[\text{Mn}(\text{GlyPmDI})(\text{DMF})_2]_n$                                     | 2D             | Y. Gong, T. J. Prior and C. Redshaw, <i>Inorg. Chim. Acta</i> , 2024, <b>561</b> , 121871                                                 |
| <b>2Mn</b> | $\{[\text{Mn}_2(\text{GlyPmDI})_2(\text{DMF})_3] \cdot 1.5\text{H}_2\text{O}\}_n$ | 2D             | This work                                                                                                                                 |
| <b>1Zn</b> | $[\text{Zn}(\text{GlyPmDI})(\text{DMF})_2]_n$                                     | 2D             | This work                                                                                                                                 |
| <b>2Zn</b> | $[\text{Zn}_2(\text{GlyPmDI})_2(\text{DMF})_3]_n$                                 | 2D             | S. Zhang, X. Liu, P. Hao, G. Li, J. Shen and Y. Fu, <i>Inorg. Chem.</i> , 2023, <b>62</b> , 14912–14921                                   |
| <b>1Co</b> | $[\text{Co}(\text{GlyPmDI})(\text{DMF})_2]_n$                                     | 2D             | Y. Gong, T. J. Prior and C. Redshaw, <i>Inorg. Chim. Acta</i> , 2024, <b>561</b> , 121871                                                 |
| <b>2Co</b> | $[\text{Co}_2(\text{GlyPmDI})_2(\text{DMF})_3]_n$                                 | 2D             | This work                                                                                                                                 |
| <b>3Ca</b> | $[\text{Ca}(\text{GlyPmDI})(\text{DMF})_2]_n$                                     | 2D             | This work                                                                                                                                 |
| <b>1Cd</b> | $[\text{Cd}(\text{GlyPmDI})(\text{DMF})_2]_n$                                     | 2D             | This work                                                                                                                                 |
| N/A        | $[\text{Cd}(\text{GlyPmDI})(\text{OH}_2)_2]_n$                                    | 2D             | Z. Zhang, L. Zhao, H.-Y. Yu and H.-T. Zhang, <i>Acta Crystallographica Section C</i> , 2024, <b>80</b> , 633–647                          |
| N/A        | $[\text{Cd}(\text{GlyPmDI})(\text{OH}_2)_2]_n$                                    | 3D             | H. Rong, Z. Liu, G. Gao, L. Su, X. Chen, H. Huang, W. Liu and Q. Liu, <i>Journal of Alloys and Compounds</i> , 2025, <b>1010</b> , 177894 |
| <b>4Cd</b> | $[\text{Cd}(\text{GlyPmDI})(\text{DMF})]_n$                                       | 3D             | This work                                                                                                                                 |
| <b>5Co</b> | $[\text{Co}(\text{AlaPmDI})(\text{DMF})]_n$                                       | 3D             | This work                                                                                                                                 |
| <b>5Zn</b> | $[\text{Zn}(\text{AlaPmDI})(\text{DMF})]_n$                                       | 3D             | B. Joarder, S. Mukherjee, A. K. Chaudhari, A. V. Desai, B. Manna and S. K. Ghosh, <i>Chem. Eur. J.</i> , 2014, <b>20</b> , 15303–15308    |
| N/A        | $\{[\text{Cu}(\text{GlyPmDI})(\text{DMA})(\text{OH}_2)] \cdot \text{DMA}\}_n$     | 1D             | H. Rong, G. Gao, X. Liu, X. Chen, Q. Jiang, X. Song, D. Shen, W. Liu and Q. Liu, <i>Cryst. Growth Des.</i> , 2023, <b>23</b> , 5437–5445  |

**Table S2.** Crystallographic and refinement parameters for the structures of the three diacids.

| Compound                                | H <sub>2</sub> GlyPmDI                                        | H <sub>2</sub> AlaPmDI·H <sub>2</sub> O                       | H <sub>2</sub> IbaPmDI                                        |
|-----------------------------------------|---------------------------------------------------------------|---------------------------------------------------------------|---------------------------------------------------------------|
| Empirical formula                       | C <sub>14</sub> H <sub>8</sub> N <sub>2</sub> O <sub>8</sub>  | C <sub>16</sub> H <sub>14</sub> N <sub>2</sub> O <sub>9</sub> | C <sub>18</sub> H <sub>16</sub> N <sub>2</sub> O <sub>8</sub> |
| Formula weight                          | 332.22                                                        | 378.29                                                        | 388.33                                                        |
| Temperature/K                           | 100(2)                                                        | 122.99(11)                                                    | 122.99(10)                                                    |
| Crystal system                          | triclinic                                                     | monoclinic                                                    | triclinic                                                     |
| Space group                             | <i>P</i> $\bar{1}$                                            | <i>C</i> 2                                                    | <i>P</i> $\bar{1}$                                            |
| a/Å                                     | 5.0740(10)                                                    | 20.7529(5)                                                    | 5.7316(2)                                                     |
| b/Å                                     | 5.2610(11)                                                    | 5.63890(10)                                                   | 6.1988(3)                                                     |
| c/Å                                     | 12.385(3)                                                     | 16.0661(3)                                                    | 12.4730(5)                                                    |
| $\alpha$ /°                             | 90.10(3)                                                      | 90                                                            | 85.726(3)                                                     |
| $\beta$ /°                              | 97.94(3)                                                      | 118.704(2)                                                    | 80.660(3)                                                     |
| $\gamma$ /°                             | 95.82(3)                                                      | 90                                                            | 81.607(3)                                                     |
| Volume/Å <sup>3</sup>                   | 325.71(12)                                                    | 1649.07(6)                                                    | 432.01(3)                                                     |
| Z                                       | 1                                                             | 4                                                             | 1                                                             |
| $\rho_{\text{calc}}$ /g/cm <sup>3</sup> | 1.694                                                         | 1.524                                                         | 1.493                                                         |
| $\mu$ /mm <sup>-1</sup>                 | 0.143                                                         | 1.099                                                         | 1.02                                                          |
| F(000)                                  | 170                                                           | 784                                                           | 202                                                           |
| Crystal size/mm <sup>3</sup>            | 0.03 × 0.02 × 0.01                                            | 0.45 × 0.09 × 0.04                                            | 0.30 × 0.30 × 0.10                                            |
| Radiation                               | Synchrotron ( $\lambda$ = 0.7108)                             | CuK $\alpha$ ( $\lambda$ = 1.54178)                           | CuK $\alpha$ ( $\lambda$ = 1.54184)                           |
| Collected using                         | Australian Synchrotron, MX1                                   | Rigaku SynergyS                                               | Rigaku SynergyS                                               |
| 2 $\theta$ range for data collection/°  | 3.322 to 63.366                                               | 6.272 to 154.032                                              | 7.192 to 153.958                                              |
| Index ranges                            | -7 ≤ h ≤ 7, -7 ≤ k ≤ 7, -17 ≤ l ≤ 17                          | -26 ≤ h ≤ 26, -6 ≤ k ≤ 6, -19 ≤ l ≤ 20                        | -5 ≤ h ≤ 7, -7 ≤ k ≤ 7, -13 ≤ l ≤ 15                          |
| Reflections collected                   | 11748                                                         | 16340                                                         | 4416                                                          |
| Independent reflections                 | 1857 [R <sub>int</sub> = 0.0509, R <sub>sigma</sub> = 0.0296] | 3312 [R <sub>int</sub> = 0.0817, R <sub>sigma</sub> = 0.0427] | 1726 [R <sub>int</sub> = 0.0333, R <sub>sigma</sub> = 0.0364] |
| Data/restraints/parameters              | 1857/1/112                                                    | 3312/6/268                                                    | 1726/1/133                                                    |
| Goodness-of-fit on F <sup>2</sup>       | 1.027                                                         | 1.107                                                         | 1.194                                                         |
| Final R indexes [I >= 2 $\sigma$ (I)]   | R <sub>1</sub> = 0.0551, wR <sub>2</sub> = 0.1392             | R <sub>1</sub> = 0.0465, wR <sub>2</sub> = 0.1268             | R <sub>1</sub> = 0.0445, wR <sub>2</sub> = 0.1134             |
| Final R indexes [all data]              | R <sub>1</sub> = 0.0712, wR <sub>2</sub> = 0.1512             | R <sub>1</sub> = 0.0482, wR <sub>2</sub> = 0.1286             | R <sub>1</sub> = 0.0568, wR <sub>2</sub> = 0.1599             |
| Largest peak/hole / e Å <sup>-3</sup>   | 0.329/-0.336                                                  | 0.214/-0.268                                                  | 0.384/-0.377                                                  |
| Flack parameter                         | -                                                             | 0.01(14)                                                      | -                                                             |
| CCDC No.                                | 2486232                                                       | 2486233                                                       | 2486234                                                       |

**Table S3.** Crystallographic and refinement parameters for the structures of the Mn-, Zn- and Co-based coordination polymers containing GlyPMDI<sup>2-</sup>.

| Compound                                    | 1Mn                                                              | 2Mn                                                                          | 2Zn                                                                           | 1Co                                                              |
|---------------------------------------------|------------------------------------------------------------------|------------------------------------------------------------------------------|-------------------------------------------------------------------------------|------------------------------------------------------------------|
| Empirical formula                           | C <sub>20</sub> H <sub>20</sub> MnN <sub>4</sub> O <sub>10</sub> | C <sub>18.33</sub> H <sub>19.09</sub> MnN <sub>3.44</sub> O <sub>10.94</sub> | C <sub>18.45</sub> H <sub>19.38</sub> N <sub>3.48</sub> O <sub>10.98</sub> Zn | C <sub>20</sub> H <sub>20</sub> CoN <sub>4</sub> O <sub>10</sub> |
| Formula weight                              | 531.34                                                           | 517.56                                                                       | 531.00                                                                        | 535.33                                                           |
| Temperature/K                               | 100                                                              | 100                                                                          | 100                                                                           | 123                                                              |
| Crystal system                              | triclinic                                                        | monoclinic                                                                   | monoclinic                                                                    | triclinic                                                        |
| Space group                                 | <i>P</i> $\bar{1}$                                               | <i>C</i> 2/c                                                                 | <i>C</i> 2/c                                                                  | <i>P</i> $\bar{1}$                                               |
| a/Å                                         | 9.880(2)                                                         | 31.934(6)                                                                    | 32.040(6)                                                                     | 9.6362(5)                                                        |
| b/Å                                         | 10.140(2)                                                        | 4.7500(9)                                                                    | 4.7400(9)                                                                     | 10.1021(7)                                                       |
| c/Å                                         | 13.570(3)                                                        | 29.072(6)                                                                    | 29.170(6)                                                                     | 13.5166(6)                                                       |
| $\alpha$ /°                                 | 84.31(3)                                                         | 90                                                                           | 90                                                                            | 84.244(4)                                                        |
| $\beta$ /°                                  | 71.44(3)                                                         | 99.72(3)                                                                     | 99.52(3)                                                                      | 71.817(4)                                                        |
| $\gamma$ /°                                 | 63.63(3)                                                         | 90                                                                           | 90                                                                            | 63.400(6)                                                        |
| Volume/Å <sup>3</sup>                       | 1153.3(5)                                                        | 4346.6(15)                                                                   | 4369.0(15)                                                                    | 1116.56(12)                                                      |
| Z                                           | 2                                                                | 8                                                                            | 8                                                                             | 2                                                                |
| $\rho_{\text{calc}}$ /cm <sup>3</sup>       | 1.530                                                            | 1.582                                                                        | 1.615                                                                         | 1.592                                                            |
| $\mu$ /mm <sup>-1</sup>                     | 0.636                                                            | 0.675                                                                        | 1.192                                                                         | 6.617                                                            |
| F(000)                                      | 546                                                              | 2005                                                                         | 2179                                                                          | 550                                                              |
| Crystal size/mm <sup>3</sup>                | 0.05 × 0.01 × 0.01                                               | 0.3 × 0.1 × 0.1                                                              | 0.1 × 0.1 × 0.05                                                              | 0.4 × 0.05 × 0.05                                                |
| Radiation                                   | Synchrotron ( $\lambda$ = 0.71076)                               | Synchrotron ( $\lambda$ = 0.71080)                                           | Synchrotron ( $\lambda$ = 0.71076)                                            | CuK $\alpha$ ( $\lambda$ = 1.54184)                              |
| Collected using                             | Australian Synchrotron, MX2                                      | Australian Synchrotron, MX1                                                  | Australian Synchrotron, MX2                                                   | Rigaku SynergyS                                                  |
| 2 $\theta$ range for data collection/°      | 4.836 to 63.538                                                  | 2.588 to 63.424                                                              | 2.578 to 64.224                                                               | 9.802 to 157.264                                                 |
| Index ranges                                | -13 ≤ h ≤ 13, -13 ≤ k ≤ 15, -20 ≤ l ≤ 20                         | -44 ≤ h ≤ 44, -6 ≤ k ≤ 6, -36 ≤ l ≤ 42                                       | -46 ≤ h ≤ 46, -6 ≤ k ≤ 6, -43 ≤ l ≤ 43                                        | -12 ≤ h ≤ 10, -12 ≤ k ≤ 12, -17 ≤ l ≤ 15                         |
| Reflections collected                       | 20472                                                            | 17719                                                                        | 36573                                                                         | 22192                                                            |
| Independent reflections                     | 6226 [R <sub>int</sub> = 0.0918, R <sub>sigma</sub> = 0.1191]    | 5848 [R <sub>int</sub> = 0.0956, R <sub>sigma</sub> = 0.1086]                | 6345 [R <sub>int</sub> = 0.0625, R <sub>sigma</sub> = 0.0512]                 | 4614 [R <sub>int</sub> = 0.0892, R <sub>sigma</sub> = 0.0520]    |
| Data/restraints/parameters                  | 6226/0/323                                                       | 5848/48/377                                                                  | 6345/0/377                                                                    | 4614/0/323                                                       |
| Goodness-of-fit on F <sup>2</sup>           | 1.148                                                            | 1.063                                                                        | 1.162                                                                         | 1.047                                                            |
| Final R indexes [I ≥ 2 $\sigma$ (I)]        | R <sub>1</sub> = 0.0880, wR <sub>2</sub> = 0.2614                | R <sub>1</sub> = 0.0980, wR <sub>2</sub> = 0.2783                            | R <sub>1</sub> = 0.0565, wR <sub>2</sub> = 0.1702                             | R <sub>1</sub> = 0.0751, wR <sub>2</sub> = 0.2171                |
| Final R indexes [all data]                  | R <sub>1</sub> = 0.0962, wR <sub>2</sub> = 0.2727                | R <sub>1</sub> = 0.1431, wR <sub>2</sub> = 0.3254                            | R <sub>1</sub> = 0.0602, wR <sub>2</sub> = 0.1745                             | R <sub>1</sub> = 0.0919, wR <sub>2</sub> = 0.2322                |
| Largest diff. peak/hole / e Å <sup>-3</sup> | 2.688/-1.493                                                     | 1.029/-0.749                                                                 | 1.146/-1.051                                                                  | 1.106/-0.804                                                     |
| CCDC No.                                    | 2486235                                                          | 2486236                                                                      | 2486237                                                                       | 2486238                                                          |

**Table S4.** Crystallographic and refinement parameters for the structures of the Ca- and Cd-based coordination polymers containing GlyPMDI<sup>2-</sup> and of **5Co**.

| Compound                                              | 3Ca                                                                          | 1Cd                                                                          | 4Cd                                                                           | 5Co                                                                            |
|-------------------------------------------------------|------------------------------------------------------------------------------|------------------------------------------------------------------------------|-------------------------------------------------------------------------------|--------------------------------------------------------------------------------|
| Empirical formula                                     | C <sub>20</sub> H <sub>20</sub> CaN <sub>4</sub> O <sub>10</sub>             | C <sub>20</sub> H <sub>20</sub> CdN <sub>4</sub> O <sub>10</sub>             | C <sub>17</sub> H <sub>13</sub> Cd <sub>1</sub> N <sub>3</sub> O <sub>9</sub> | C <sub>38</sub> H <sub>34</sub> Co <sub>2</sub> N <sub>6</sub> O <sub>18</sub> |
| Formula weight                                        | 516.48                                                                       | 588.80                                                                       | 515.70                                                                        | 980.57                                                                         |
| Temperature/K                                         | 100                                                                          | 123                                                                          | 100                                                                           | 100                                                                            |
| Crystal system                                        | monoclinic                                                                   | triclinic                                                                    | orthorhombic                                                                  | Monoclinic                                                                     |
| Space group                                           | <i>P</i> 2 <sub>1</sub> / <i>c</i>                                           | <i>P</i> $\bar{1}$                                                           | <i>P</i> 2 <sub>1</sub> 2 <sub>1</sub>                                        | <i>P</i> 2 <sub>1</sub>                                                        |
| <i>a</i> /Å                                           | 13.425(3)                                                                    | 4.97300(10)                                                                  | 4.7900(10)                                                                    | 8.6250(17)                                                                     |
| <i>b</i> /Å                                           | 17.687(4)                                                                    | 9.0826(4)                                                                    | 15.013(3)                                                                     | 20.581(4)                                                                      |
| <i>c</i> /Å                                           | 9.6290(19)                                                                   | 12.8166(4)                                                                   | 25.310(5)                                                                     | 12.070(2)                                                                      |
| $\alpha$ /°                                           | 90                                                                           | 91.128(3)                                                                    | 90                                                                            | 90                                                                             |
| $\beta$ /°                                            | 91.03(3)                                                                     | 92.195(2)                                                                    | 90                                                                            | 101.80(3)                                                                      |
| $\gamma$ /°                                           | 90                                                                           | 94.386(2)                                                                    | 90                                                                            | 90                                                                             |
| Volume/Å <sup>3</sup>                                 | 2286.0(8)                                                                    | 576.63(3)                                                                    | 1820.1(6)                                                                     | 2099.7(8)                                                                      |
| Z                                                     | 4                                                                            | 1                                                                            | 4                                                                             | 2                                                                              |
| $\rho_{\text{calc}}$ /cm <sup>3</sup>                 | 1.501                                                                        | 1.696                                                                        | 1.882                                                                         | 1.551                                                                          |
| $\mu$ /mm <sup>-1</sup>                               | 0.339                                                                        | 1.010                                                                        | 1.260                                                                         | 0.874                                                                          |
| F(000)                                                | 1072                                                                         | 296                                                                          | 1024                                                                          | 1004                                                                           |
| Crystal size/mm <sup>3</sup>                          | 0.05 × 0.01 × 0.01                                                           | 0.42 × 0.05 × 0.03                                                           | 0.3 × 0.1 × 0.1                                                               | 0.06 × 0.02 × 0.01                                                             |
| Radiation                                             | Synchrotron ( $\lambda$ = 0.71092)                                           | MoK $\alpha$ ( $\lambda$ = 0.71073)                                          | Synchrotron ( $\lambda$ = 0.71090)                                            | Synchrotron ( $\lambda$ = 0.71080)                                             |
| Collected using                                       | Australian Synchrotron, MX2                                                  | Rigaku SynergyS                                                              | Australian Synchrotron, MX1                                                   | Australian Synchrotron, MX1                                                    |
| 2 $\Theta$ range for data collection/°                | 3.034 to 54.998                                                              | 5.452 to 49.984                                                              | 3.154 to 54.998                                                               | 3.44 – 57.00                                                                   |
| Index ranges                                          | -17 ≤ <i>h</i> ≤ 17, -22 ≤ <i>k</i> ≤ 22, -12 ≤ <i>l</i> ≤ 12                | -5 ≤ <i>h</i> ≤ 5, -10 ≤ <i>k</i> ≤ 10, -15 ≤ <i>l</i> ≤ 15                  | -6 ≤ <i>h</i> ≤ 6, -14 ≤ <i>k</i> ≤ 19, -32 ≤ <i>l</i> ≤ 25                   | -11 ≤ <i>h</i> ≤ 11, -27 ≤ <i>k</i> ≤ 27, -15 ≤ <i>l</i> ≤ 16                  |
| Reflections collected                                 | 30533                                                                        | 34715                                                                        | 8379                                                                          | 56343                                                                          |
| Independent reflections                               | 5201 [ <i>R</i> <sub>int</sub> = 0.1666, <i>R</i> <sub>sigma</sub> = 0.1027] | 2019 [ <i>R</i> <sub>int</sub> = 0.1281, <i>R</i> <sub>sigma</sub> = 0.0360] | 4053 [ <i>R</i> <sub>int</sub> = 0.1694, <i>R</i> <sub>sigma</sub> = 0.1635]  | 10548 [ <i>R</i> <sub>int</sub> = 0.0923, <i>R</i> <sub>sigma</sub> = 0.0515]  |
| Data/restraints/parameters                            | 5201/0/320                                                                   | 2019/0/192                                                                   | 4053/28/143                                                                   | 10548/199/775                                                                  |
| Goodness-of-fit on F <sup>2</sup>                     | 1.092                                                                        | 1.062                                                                        | 1.201                                                                         | 1.034                                                                          |
| Final R indexes [ <i>I</i> ≥ 2 $\sigma$ ( <i>I</i> )] | <i>R</i> <sub>1</sub> = 0.1531, <i>wR</i> <sub>2</sub> = 0.3902              | <i>R</i> <sub>1</sub> = 0.0236, <i>wR</i> <sub>2</sub> = 0.0556              | <i>R</i> <sub>1</sub> = 0.1419, <i>wR</i> <sub>2</sub> = 0.3587               | <i>R</i> <sub>1</sub> = 0.0634, <i>wR</i> <sub>2</sub> = 0.1744                |
| Final R indexes [all data]                            | <i>R</i> <sub>1</sub> = 0.2235, <i>wR</i> <sub>2</sub> = 0.4302              | <i>R</i> <sub>1</sub> = 0.0240, <i>wR</i> <sub>2</sub> = 0.0558              | <i>R</i> <sub>1</sub> = 0.2473, <i>wR</i> <sub>2</sub> = 0.4283               | <i>R</i> <sub>1</sub> = 0.0770, <i>wR</i> <sub>2</sub> = 0.1879                |
| Largest diff. peak/hole / e Å <sup>-3</sup>           | 1.029/-0.617                                                                 | 0.370/-0.447                                                                 | 3.910/-1.499                                                                  | 0.747/-0.454                                                                   |
| Flack parameter                                       | N/A                                                                          | N/A                                                                          | 0.5(2)                                                                        | 0.06(2)                                                                        |
| CCDC No.                                              | 2486239                                                                      | 2486240                                                                      | 2486241                                                                       | 2486242                                                                        |

## Additional Crystallographic Refinement Details

### $\text{H}_2\text{AlaPmDI} \cdot \text{H}_2\text{O}$

One oxygen atom was disordered over two positions with occupancies refined against each other (66:34).

### $[\text{Mn}(\text{GlyPmDI})(\text{DMF})_2]_n$ (**1Mn**)

Electron density within voids that could not be sensibly modelled had its contribution to the diffraction data accounted for using the BYPASS routine within Olex2. This corresponded to  $45 \text{ \AA}^3$  and 5 electrons per asymmetric unit, insufficient to assign any sensible solvent model.

### $\{[\text{Mn}_2(\text{GlyPmDI})_2(\text{DMF})_3] \cdot 1.5\text{H}_2\text{O}\}_n$ (**2Mn**)

The metal was modelled as disordered over two positions, Mn1 and Mn2, with the occupancies of refined freely to a 44:56 ratio. Mn1 has two axial DMF ligands, Mn2 has one DMF ligand. All DMF ligands were refined using the same free variable for occupancy as the metal to which they are coordinated. Two of the DMF positions are overlapping and are modelled using some isotropic restraints (SHELX ISOR). The structure contains small voids in which no sensible model could be generated ( $50 \text{ \AA}^3$  per ASU containing  $16 e^-$ ); this was tentatively attributed to 1.5  $\text{H}_2\text{O}$  molecules per ASU and is incorporated into the molecular formula.

### $\{[\text{Zn}_2(\text{GlyPmDI})_2(\text{DMF})_3] \cdot 1.5\text{H}_2\text{O}\}_n$ (**2Zn**)

Isostructural to **2Mn** (above) with the Zn1 and Zn2 occupancies, and those of their attached DMF ligands, freely refined to 48:52. The structure contains small voids in which no sensible model could be generated ( $50 \text{ \AA}^3$  per ASU containing  $14 e^-$ ); this was tentatively attributed to 1.5  $\text{H}_2\text{O}$  molecules per ASU and is incorporated into the molecular formula.

### $[\text{Ca}(\text{GlyPmDI})(\text{DMF})_2]_n$ (**3Ca**)

The data is of very low quality (evidenced by high  $R_{\text{int}}$  and consequently high  $wR_2$  values). This is the best data that could be obtained, using synchrotron radiation, despite many attempts. However, the structure was able to be refined without restraints.

### $[\text{Cd}(\text{GlyPmDI})(\text{DMF})]_n$ (**4Cd**)

The data is of very low quality (evidenced by high  $R_{\text{int}}$  and consequently high  $wR_2$  values). This is the best data that could be obtained, using synchrotron radiation, despite many attempts,

yet is sufficient for unambiguous connectivity to be established and it is presented in this context only.

Only the metal ion was modelled anisotropically, with all other atoms modelled isotropically. SHELXL distance restraints (DFIX and DANG) were utilised to make several bond lengths and angles more chemically sensible. The coordinated DMF is disordered over two positions (fixed occupancies of 50:50) and restraints (SHELX FLAT, DFIX, DANG) were used to model the DMF. The structure was refined as a racemic twin.

#### [Co(AlaPmDI)(DMF)]<sub>n</sub> (**5Co**)

One of the AlaPmDI<sup>2-</sup> ligands is almost entirely disordered over two positions; only one N-CH(CH<sub>3</sub>)-CO<sub>2</sub> fragment and the carboxylate oxygen atoms of the opposing end are shared between the two positions. The two positions were refined at fixed 50:50 occupancies as this is geometrically required to avoid clashes between the two components. A number of SHELX DFIX/DANG restraints were employed to fix the geometry of the two components, alongside ISOR restraints to control the displacement ellipsoids. One of the DMF ligands is also disordered over two positions (50:50 as the orientations are related to those of the disordered ligand).

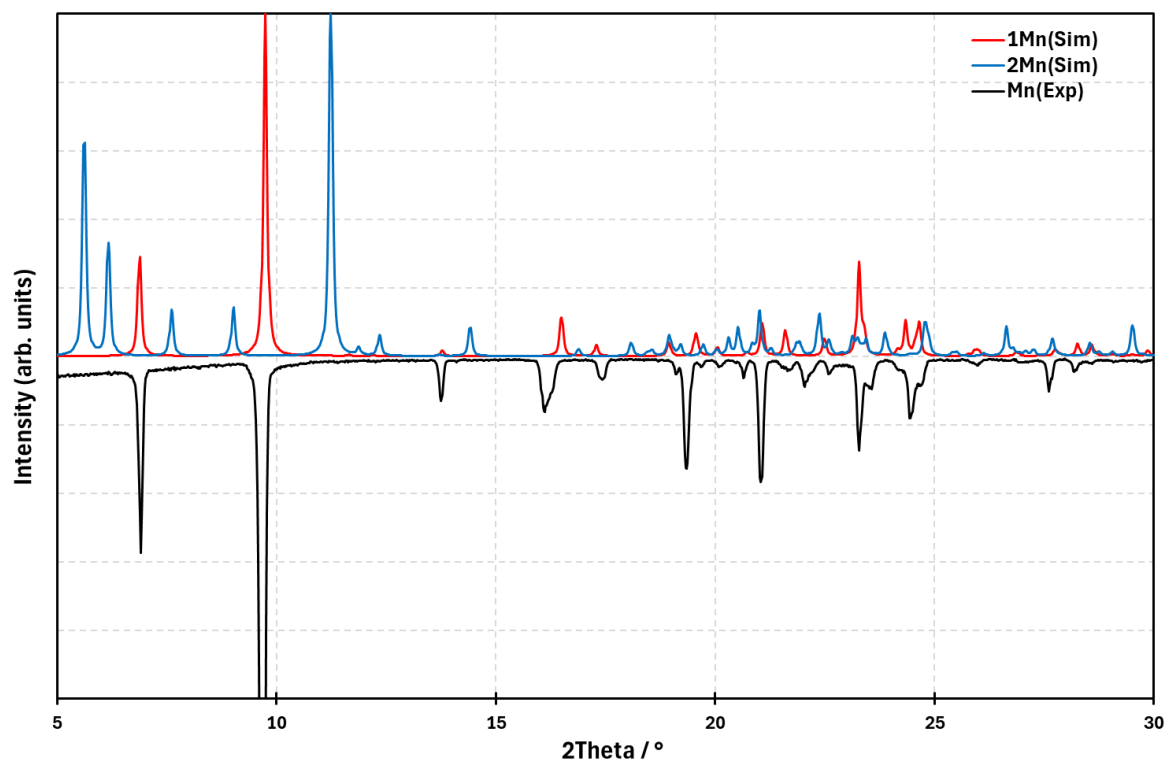

**Figure S1.** Comparison of the experimental PXRD pattern (at room temperature) from reaction of  $\text{H}_2\text{GlyPmDI}$  and  $\text{Mn}(\text{NO}_3)_2$  that isolated the single crystal structure **1Mn** and the calculated PXRD patterns from the SCXRD structures of **1Mn** and **2Mn** collected at 100 K. The bulk sample is purely **1Mn** with no indication of the less solvated **2Mn**.

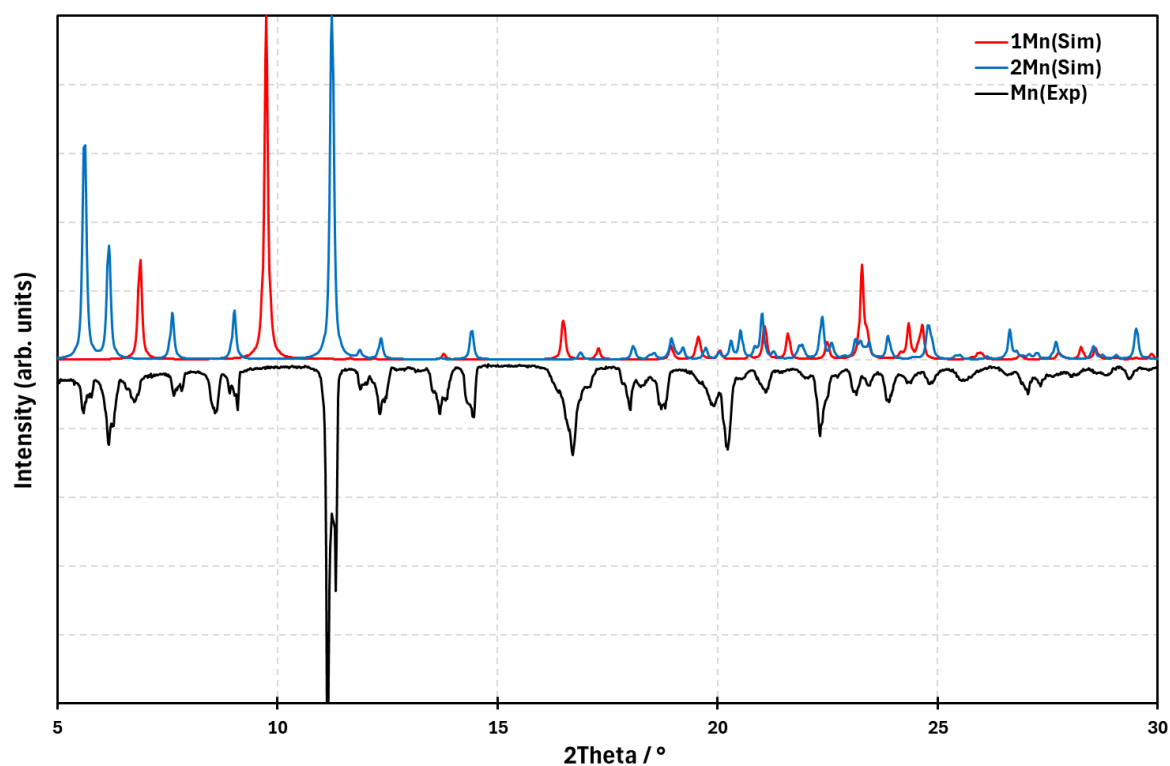

**Figure S2.** Comparison of the experimental PXRD pattern (at room temperature) from reaction of  $\text{H}_2\text{GlyPmDI}$  and  $\text{Mn}(\text{NO}_3)_2$  that isolated the single crystal structure **2Mn** and the calculated PXRD patterns from the SCXRD structures of **1Mn** and **2Mn** collected at 100 K. The bulk sample contains both **1Mn** and **2Mn**.

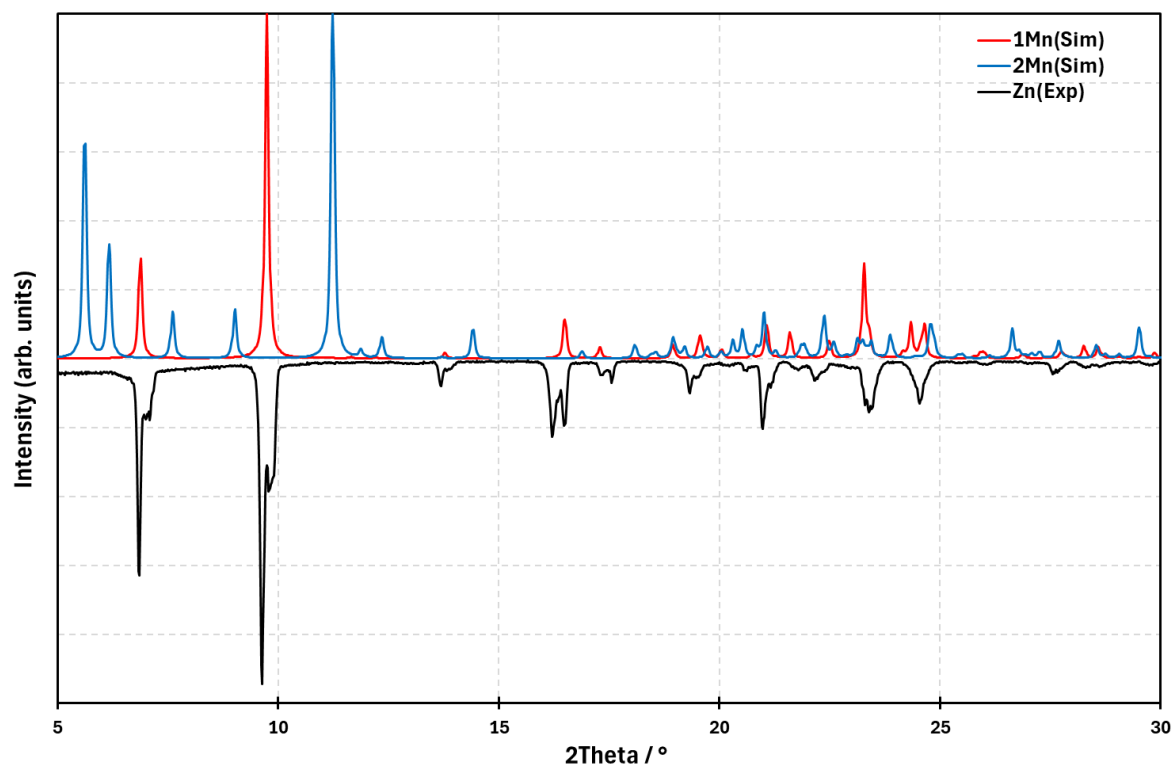

**Figure S3.** Comparison of the experimental PXRD pattern (at room temperature) from reaction of  $\text{H}_2\text{GlyPmDI}$  and  $\text{Zn}(\text{NO}_3)_2$  and the calculated PXRD patterns from the SCXRD structures of **1Mn** and **2Mn** collected at 100 K. Although the SCXRD structure of **2Zn** was obtained from this reaction, the bulk material is isostructural with **1Mn**.

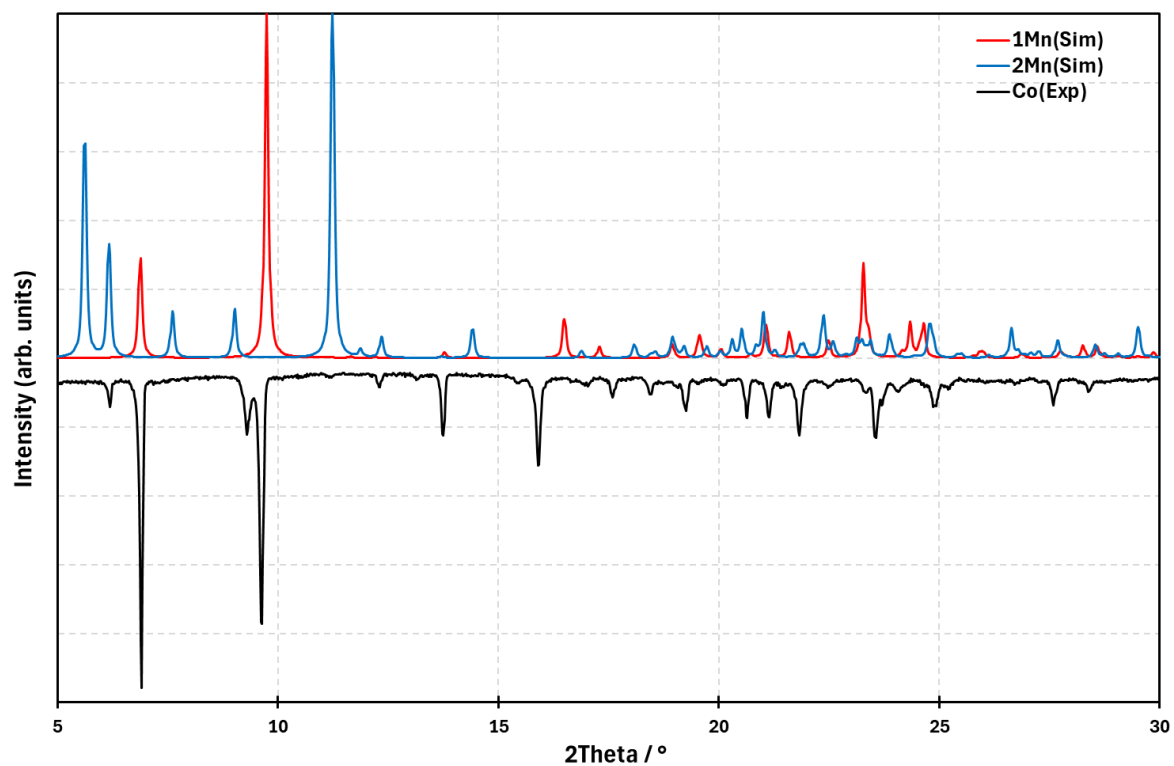

**Figure S4.** Comparison of the experimental PXRD pattern (at room temperature) from reaction of  $\text{H}_2\text{GlyPmDI}$  and  $\text{Co}(\text{NO}_3)_2$  and the calculated PXRD patterns from the SCXRD structures of **1Mn** and **2Mn** collected at 100 K.

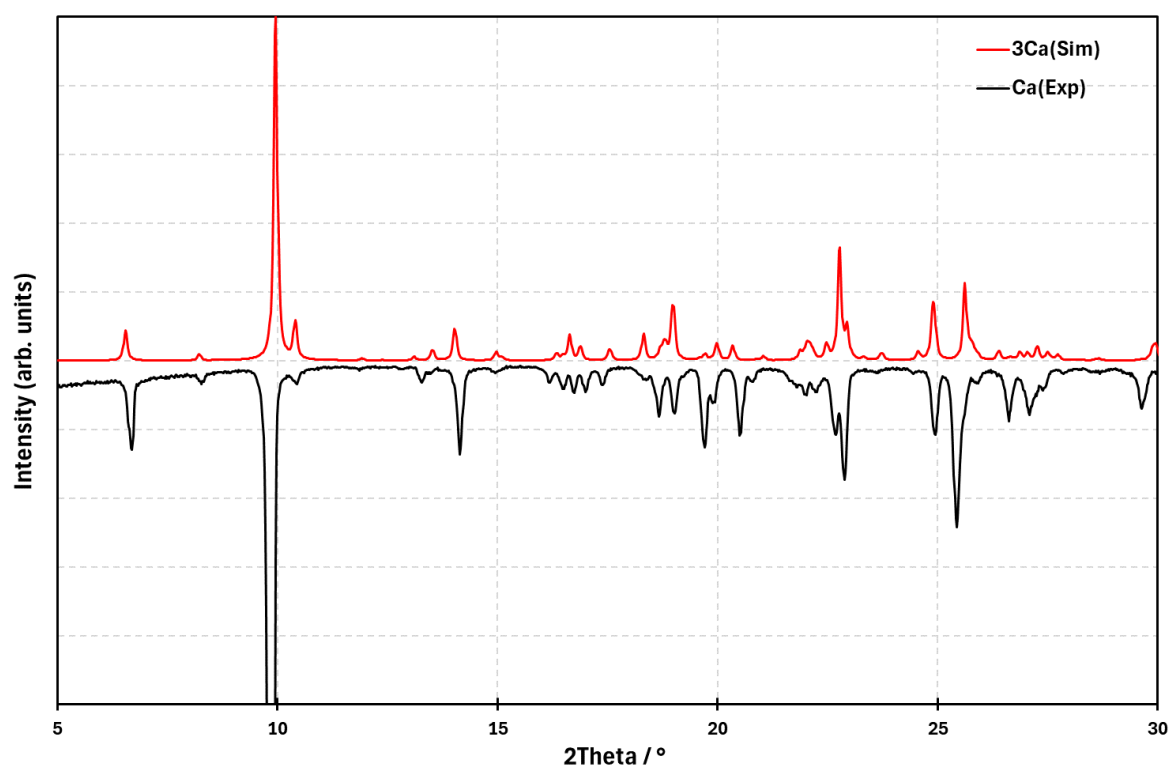

**Figure S5.** Comparison of the experimental PXRD pattern (at room temperature) from reaction of  $\text{H}_2\text{GlyPmDI}$  and  $\text{Ca}(\text{NO}_3)_2$  and the calculated PXRD patterns from the SCXRD structure of **3Ca** collected at 100 K.

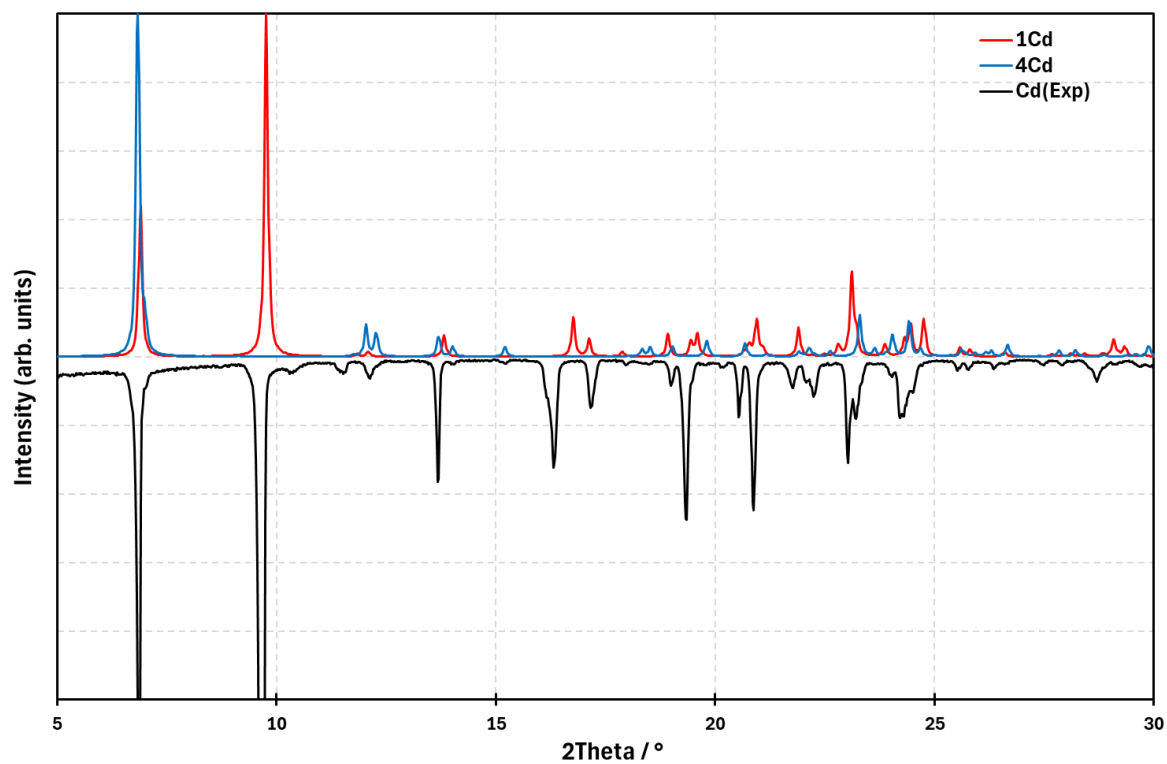

**Figure S6.** Comparison of the experimental PXRD pattern (at room temperature) from reaction of  $\text{H}_2\text{GlyPmDI}$  and  $\text{Cd}(\text{NO}_3)_2$  at  $70\text{ }^\circ\text{C}$  and the calculated PXRD patterns from the SCXRD structure of **1Cd** and **4Cd** collected at  $100\text{ K}$ .

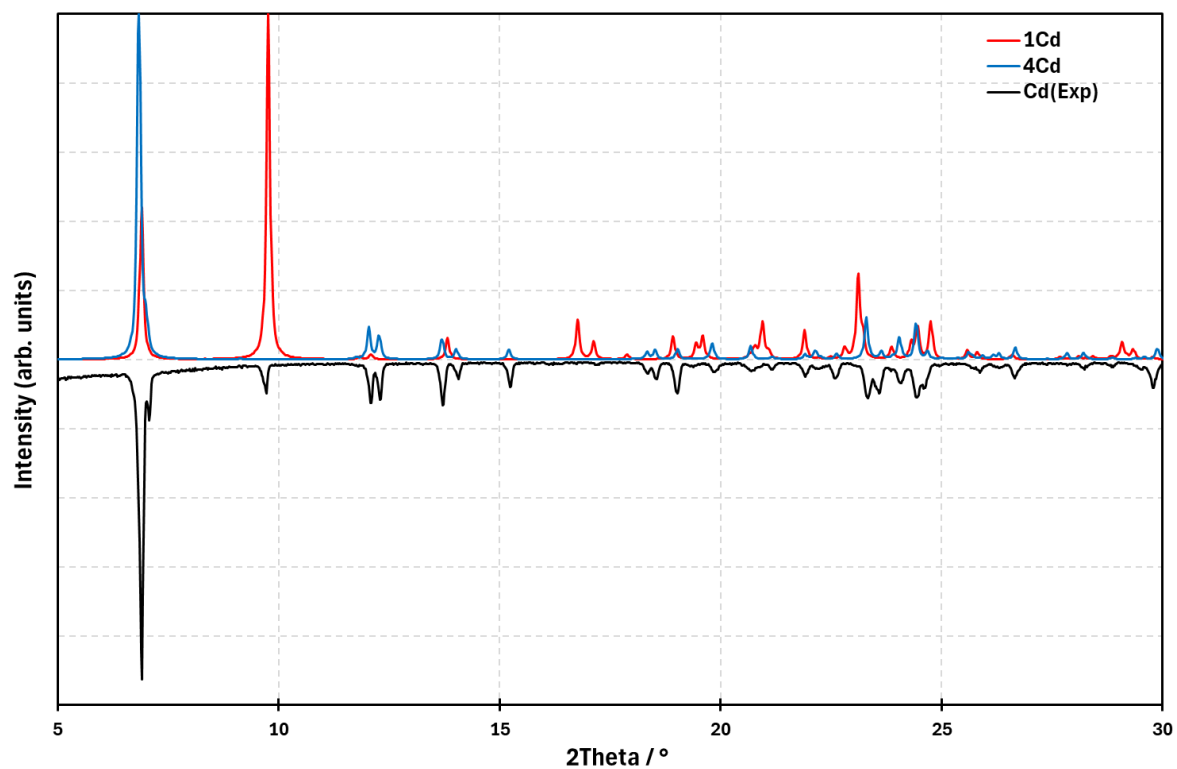

**Figure S7.** Comparison of the experimental PXRD pattern (at room temperature) from reaction of  $\text{H}_2\text{GlyPmDI}$  and  $\text{Cd}(\text{NO}_3)_2$  at 70 °C and the calculated PXRD patterns from the SCXRD structure of **1Cd** and **4Cd** collected at 100 K.

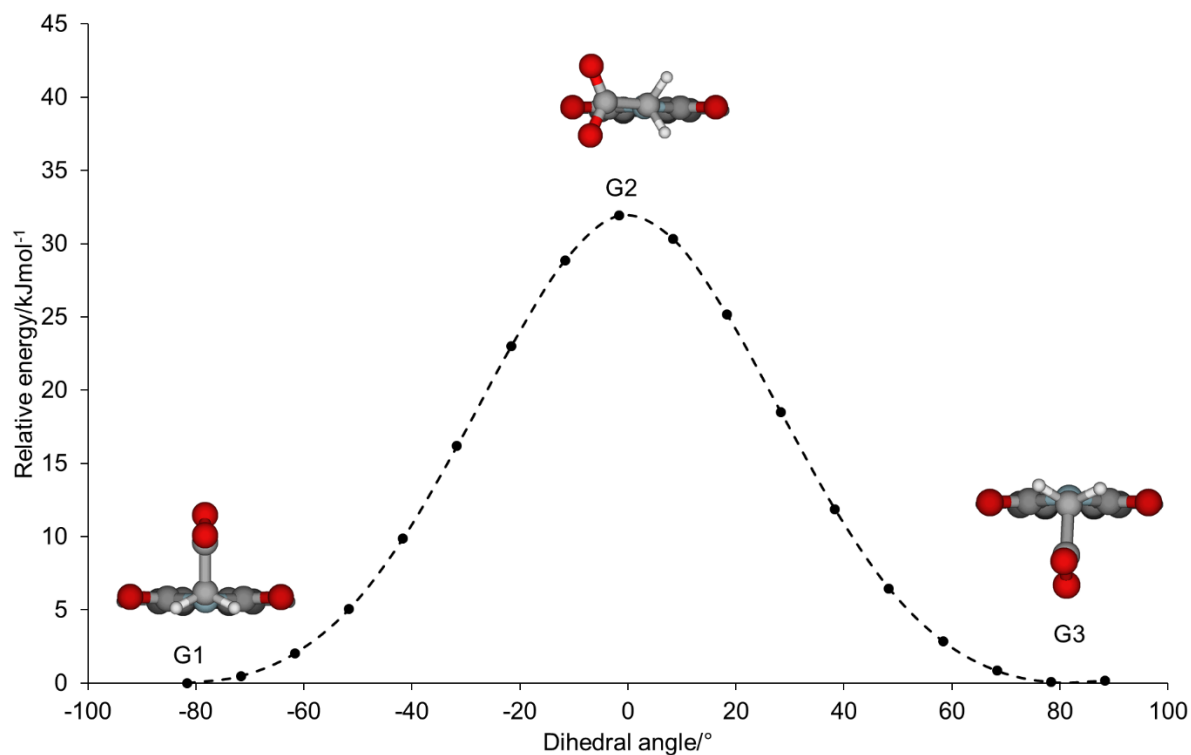

**Figure S8.** Energy profile for a relaxed rotational scan around the imide N- $\alpha$ C bond for glycine-phthalimide, highlighting the structures of the minima/maxima.

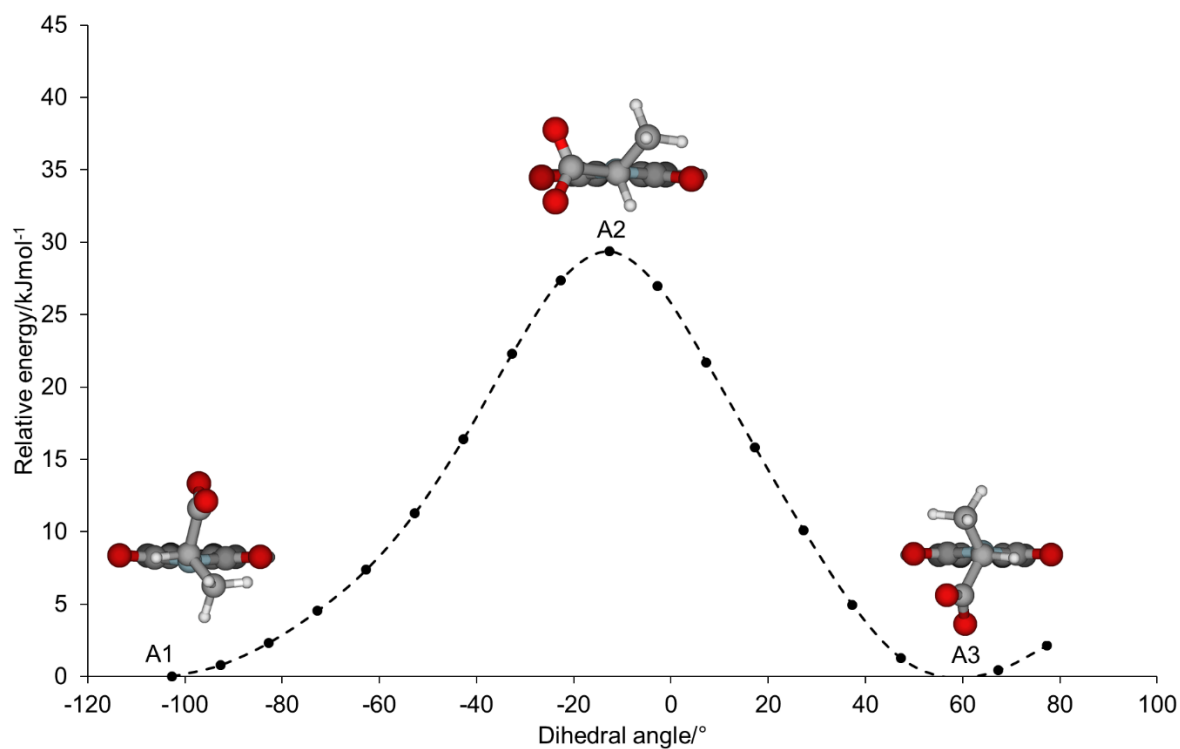

**Figure S9.** Energy profile for a relaxed rotational scan around the imide N- $\alpha$ C bond for alanine-phthalimide, highlighting the structures of the minima/maxima.

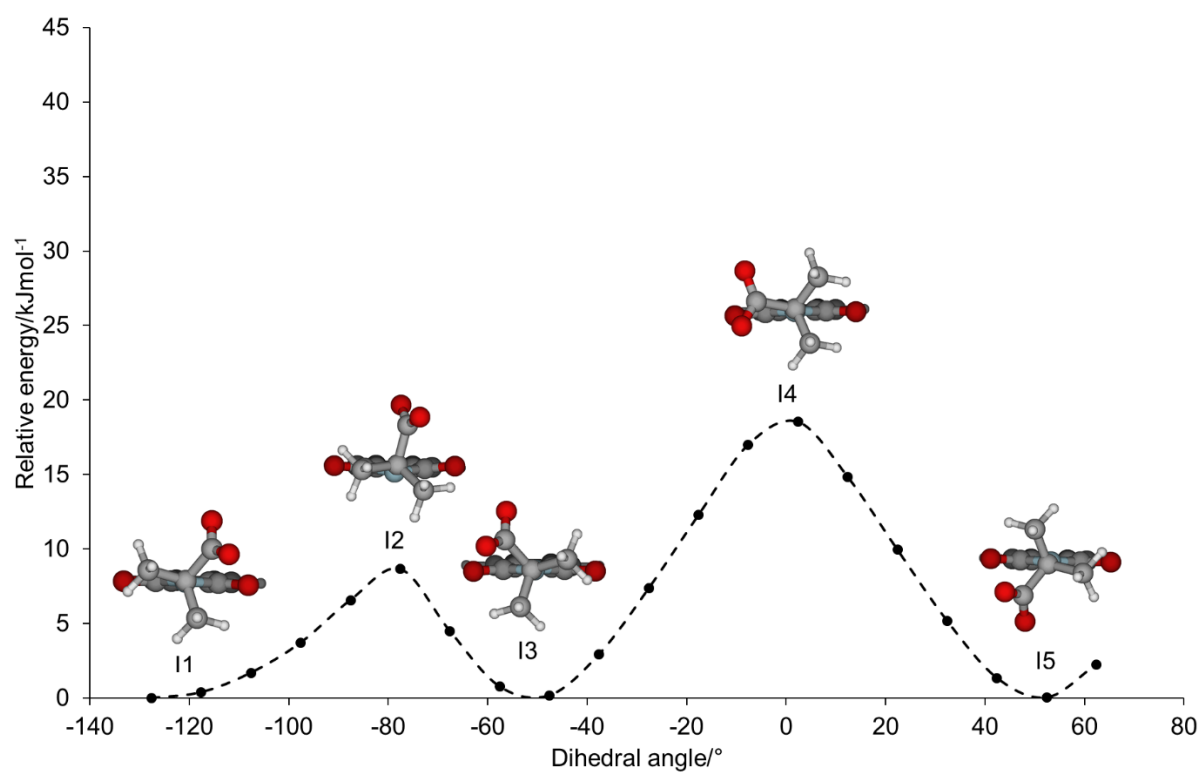

**Figure S10.** Energy profile for a relaxed rotational scan around the imide N- $\alpha$ C bond for isobutyrate-phthalimide, highlighting the structures of the minima/maxima.

## References

1. A. Spek, *Acta Crystallographica Section C*, 2015, **71**, 9-18.
2. O. V. Dolomanov, L. J. Bourhis, R. J. Gildea, J. A. K. Howard and H. Puschmann, *Journal of Applied Crystallography*, 2009, **42**, 339-341.
